# Supplementary material
Source: PubMed Central journal article supplement (PMC1863485)

**a**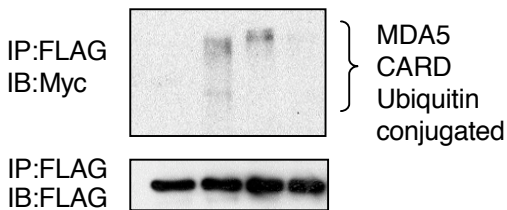

|               |   |   |    |         |
|---------------|---|---|----|---------|
| FLAG-MDA5CARD | + | + | +  | +       |
| Myc-Ub        | - | + | +  | +       |
| HA-RNF125     | - | - | wt | C72/75A |

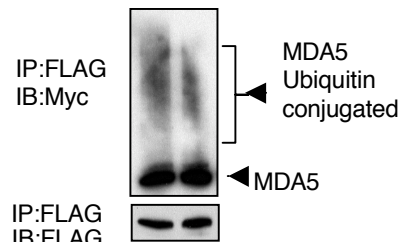

|            |   |   |
|------------|---|---|
| FLAG-MDA5  | + | + |
| Myc-Ub     | + | + |
| Si-control | + | - |
| Si-RNF125  | - | + |
|            | 1 | 2 |

**b**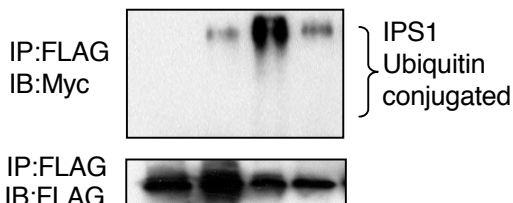

|           |   |   |    |         |
|-----------|---|---|----|---------|
| FLAG-IPS1 | + | + | +  | +       |
| Myc-Ub    | - | + | +  | +       |
| HA-RNF125 | - | - | wt | C72/75A |

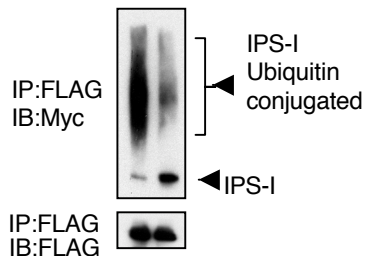

|            |   |   |
|------------|---|---|
| FLAG-IPS1  | + | + |
| Myc-Ub     | + | + |
| Si-control | + | - |
| Si-RNF125  | - | + |
|            | 1 | 2 |

**c**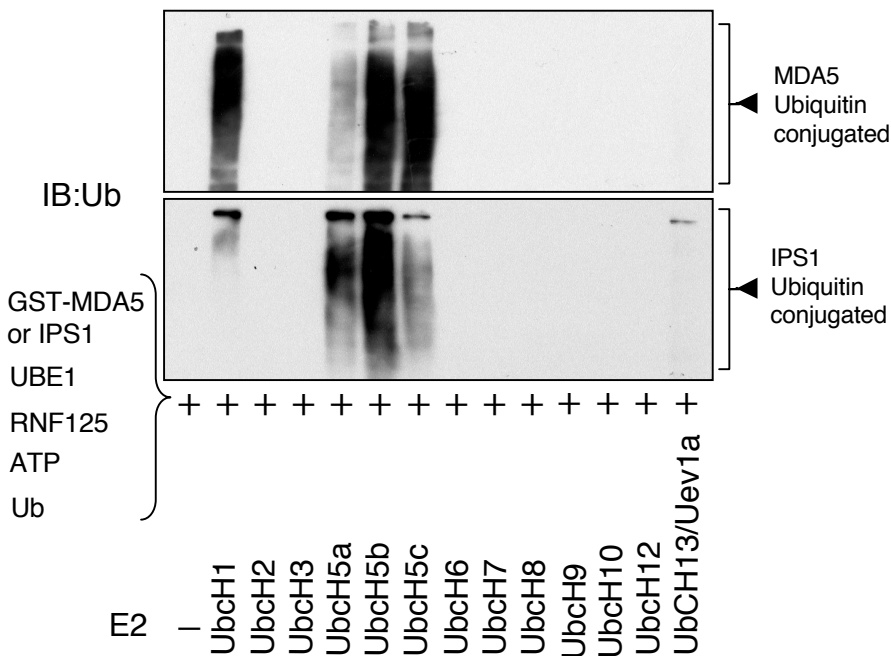

Supplement: pnas_0611551104_3.pdf [file pnas_0611551104_3.pdf]
