# Supplementary material
Source: PubMed Central journal article supplement (PMC1863485)

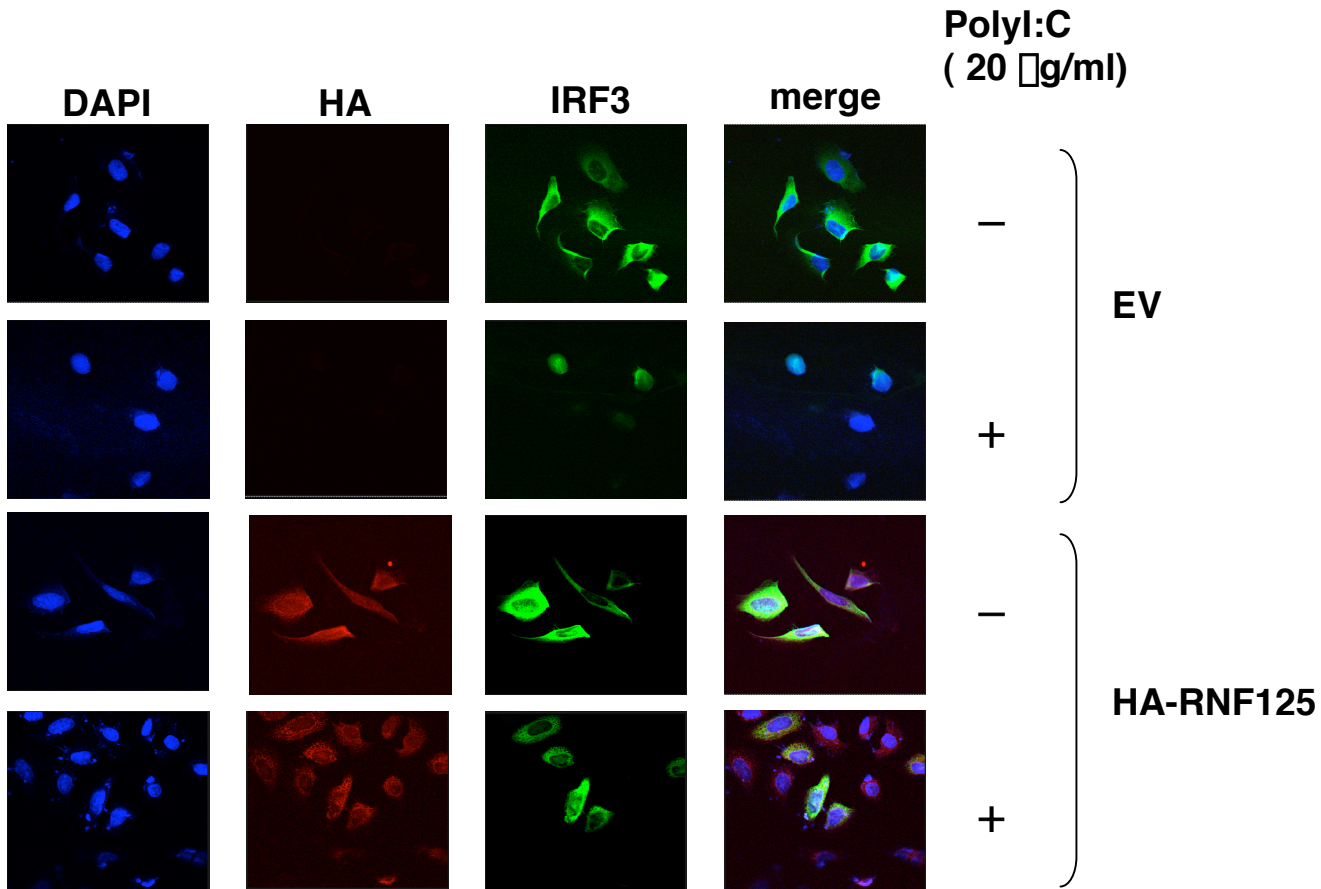

Supplement: pnas_0611551104_2.pdf [file pnas_0611551104_2.pdf]

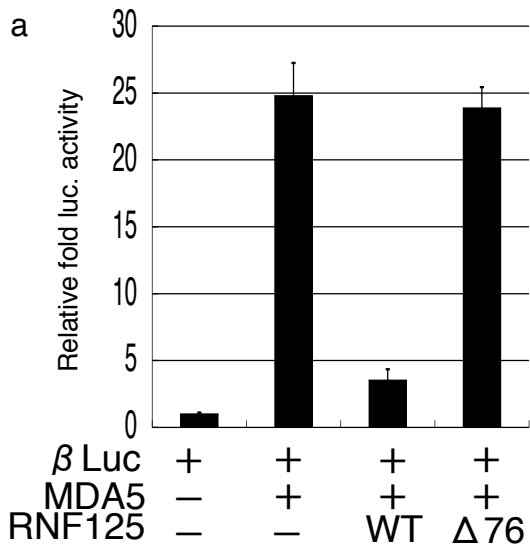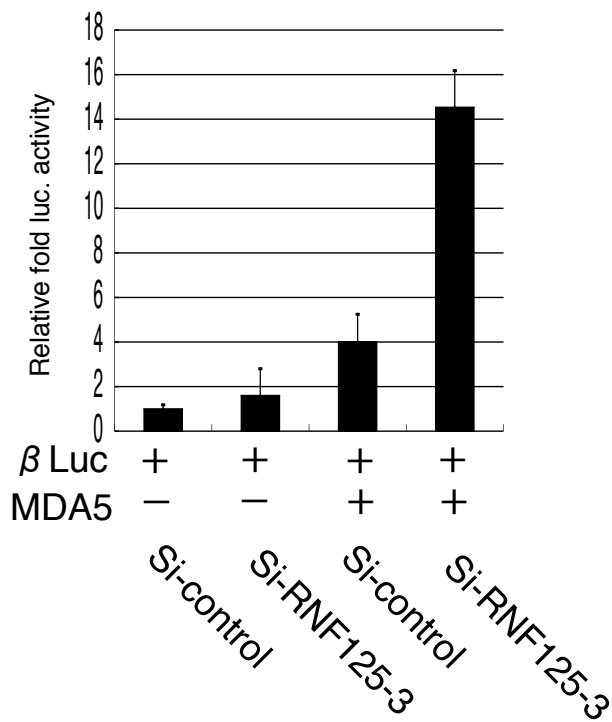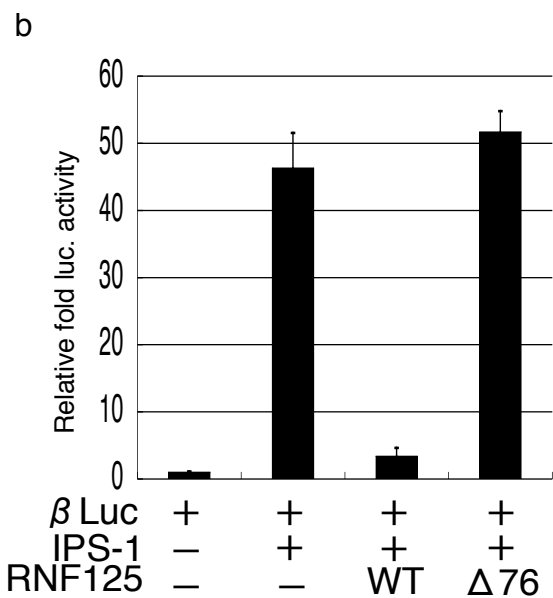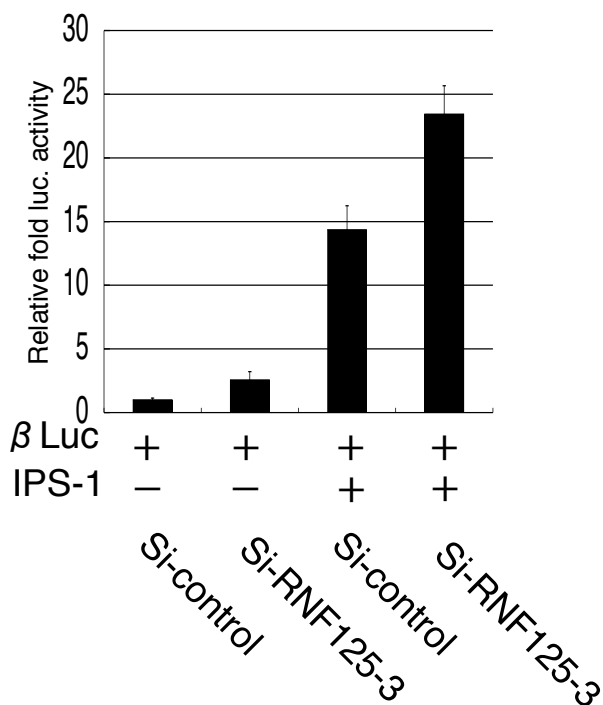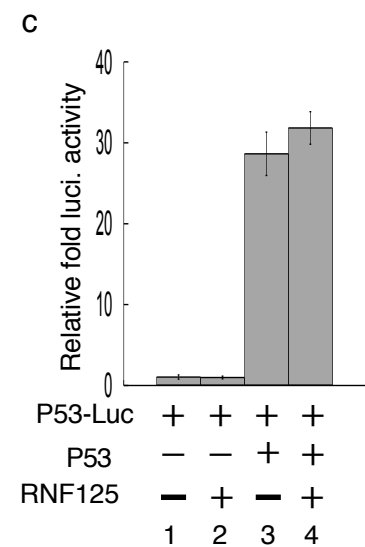

Supplement: pnas_0611551104_4.pdf [file pnas_0611551104_4.pdf]
